# Supplementary material
Source: PubMed Central journal article supplement (PMC6195851)
Supplement: NIHMS961764-supplement-Supp_info.pdf [file NIHMS961764-supplement-Supp_info.pdf]

Supplementary Figure 1. Absolute number of B cell subsets per 0.1 gm of tissue. Shown here are the mean±S.D. of A. weight of a whole liver or spleen at various ages. B. absolute number of each B cell subset per 0.1 gm of tissue weight.

Supplementary Figure 2. Representative H&E pictures of extrahepatic bile ducts from RRV-infected mice that received adoptively transferred B cells.

Supplementary 3. Adoptive transfer of B cells into RRV-infected Ig- $\alpha^{-/-}$  mice results in increased liver NK cell infiltrates. Summary of absolute numbers of liver NK cell infiltrates in newborn Ig- $\alpha^{-/-}$  recipient mice that received either BSS or RRV alone, 14 day old control (BSS) B cells ( $1 \times 10^7$  cells i.p.) with BSS or RRV, or 14 day old BA (RRV) B cells ( $1 \times 10^7$  cells i.p.) with BSS or RRV. \* $p < 0.05$

Supplementary Figure 4. Characterization of 3-83 Ig knock-in mouse B cells. Representative density plots of liver and spleen B cells from wildtype (WT) and 3-83 Ig knock-in mice (3-83) (gated on FSC/SSC lymphocytes, CD45<sup>+</sup> cells, CD19<sup>+</sup> cells). 3-83Ig<sup>+</sup> B cells are identified based on staining with the anti-idiotypic antibody to 3-83 heavy and light chain (clone 54.1). These cells are also kappa-positive and lambda low/negative.

Supplementary Figure 5. RRV-BA B cells produce pro-inflammatory molecules. *Ex-vivo* analysis of intracellular cytokine staining of liver and spleen B cells from BSS-control and RRV-BA mice (gated on FSC/SSC lymphocytes, CD45<sup>+</sup> cells, CD19<sup>+</sup> IgM<sup>+</sup> cells). \*\* $p < 0.005$ ; \* $p < 0.05$

Supplementary Figure 6. Purification of liver B cells for RNA-Seq analysis. Summary FACS

analysis of ARIA cell sorting of B cells from BSS-control and RRV-BA livers, verifying that the isolated cells were positive for CD19 and negative for other immune cell markers (CD3, CD11b, F480, NKG2d). Levels of B cell purity from parent lymphocyte group was 98-100%.

Supplementary Figure 7. RNA-Seq rank list of fold change in RRV-BA liver B cell genes. Shown is the fold change in gene expression from RRV-BA liver B cells compared to BSS-control liver

Supplementary Figure 1.

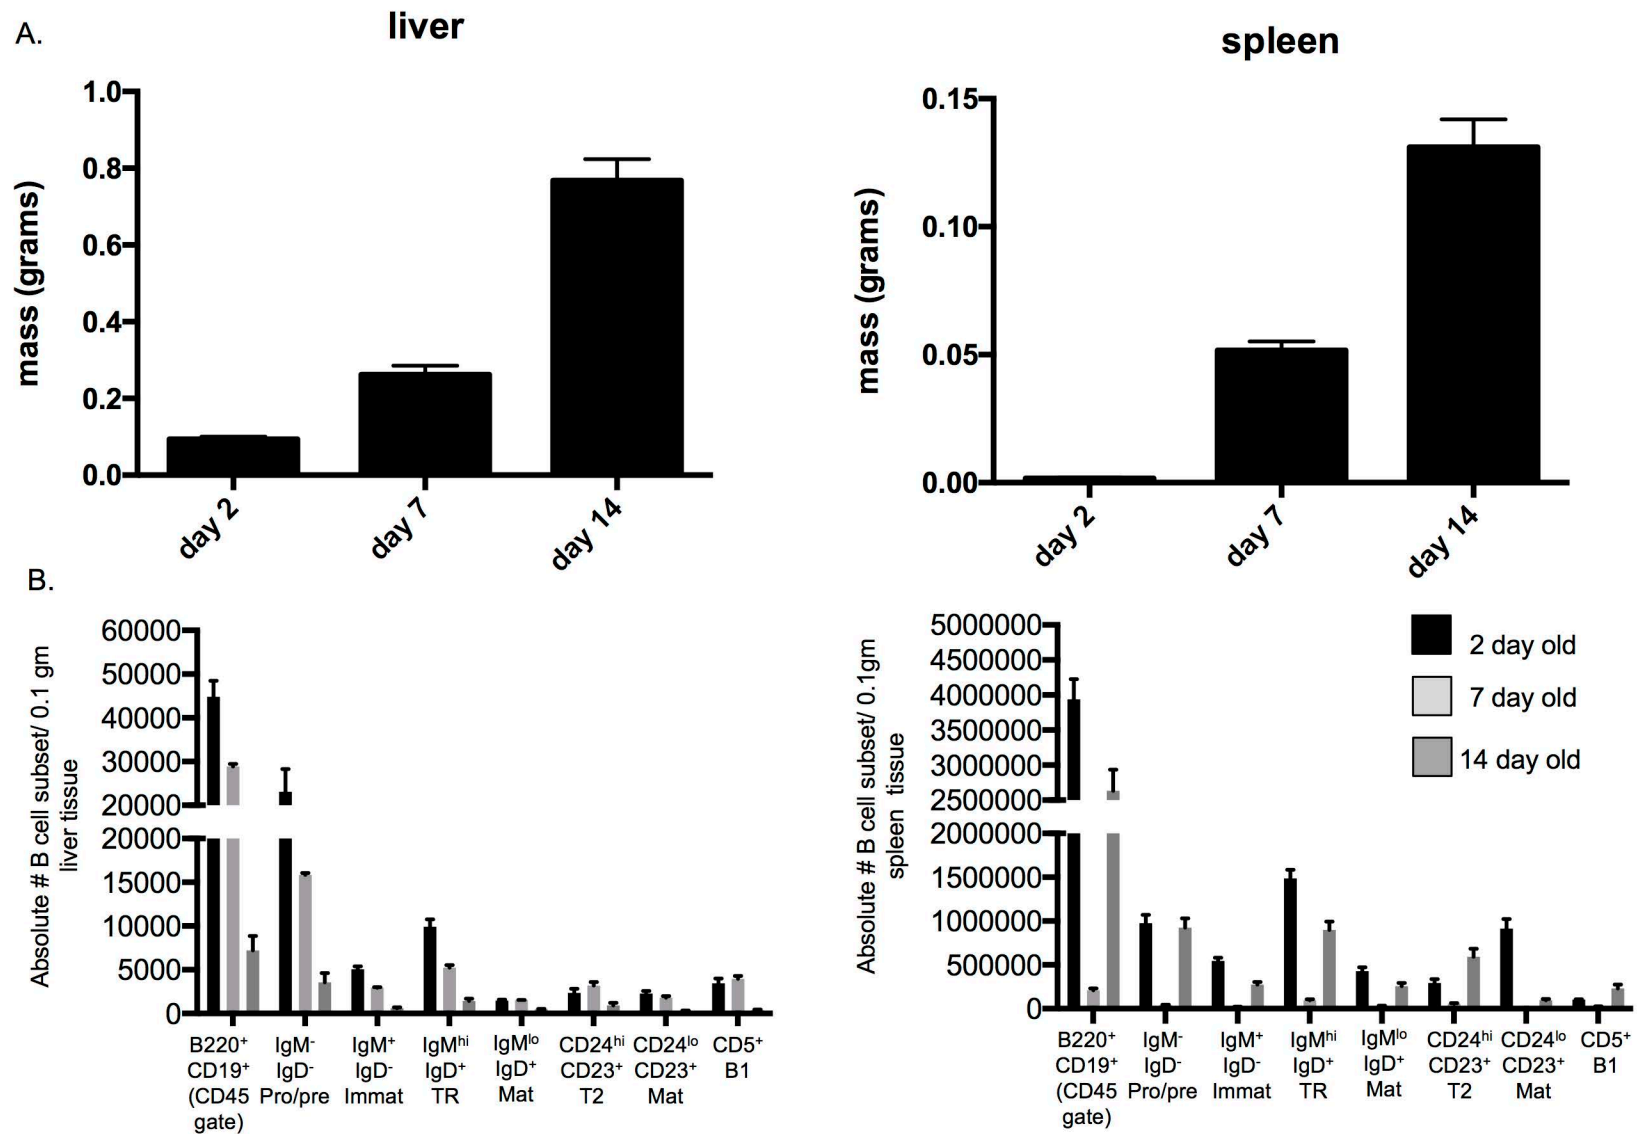

Supplementary Figure 2.

RRV-injected  $Ig\text{-}\alpha^{-/-}$  mouse

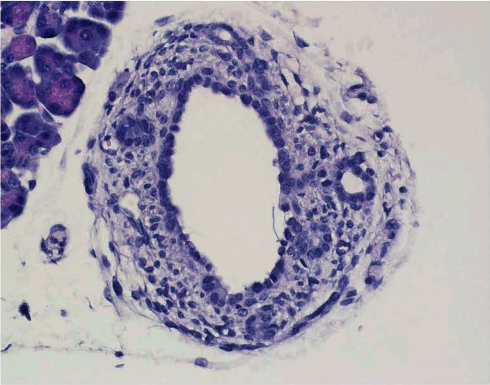

Control B cells + RRV into  $Ig\text{-}\alpha^{-/-}$

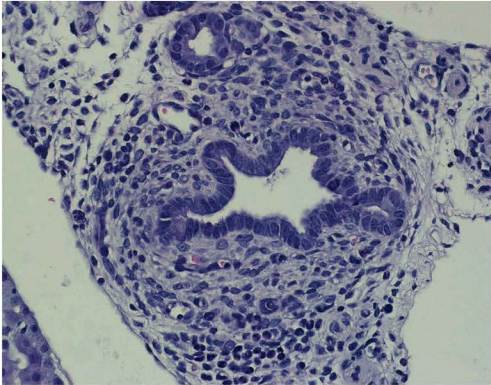

BA B cells + RRV into  $Ig\text{-}\alpha^{-/-}$

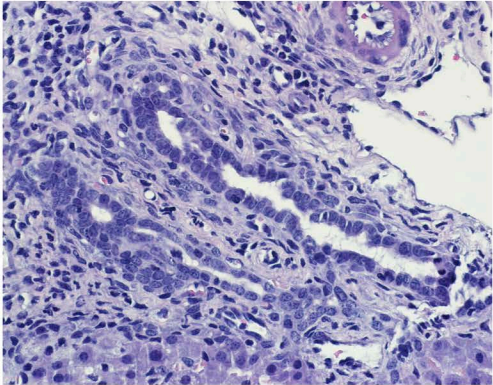

Supplementary Figure 3.

Liver absolute NK (CD49b<sup>+</sup>) cell numbers in Ig- $\alpha^{-/-}$  mice

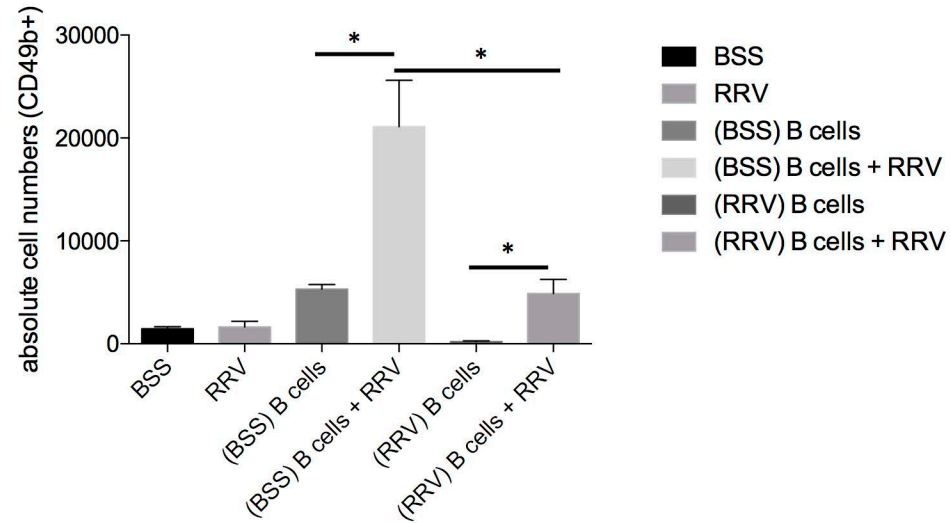

Supplementary Figure 4.

Liver

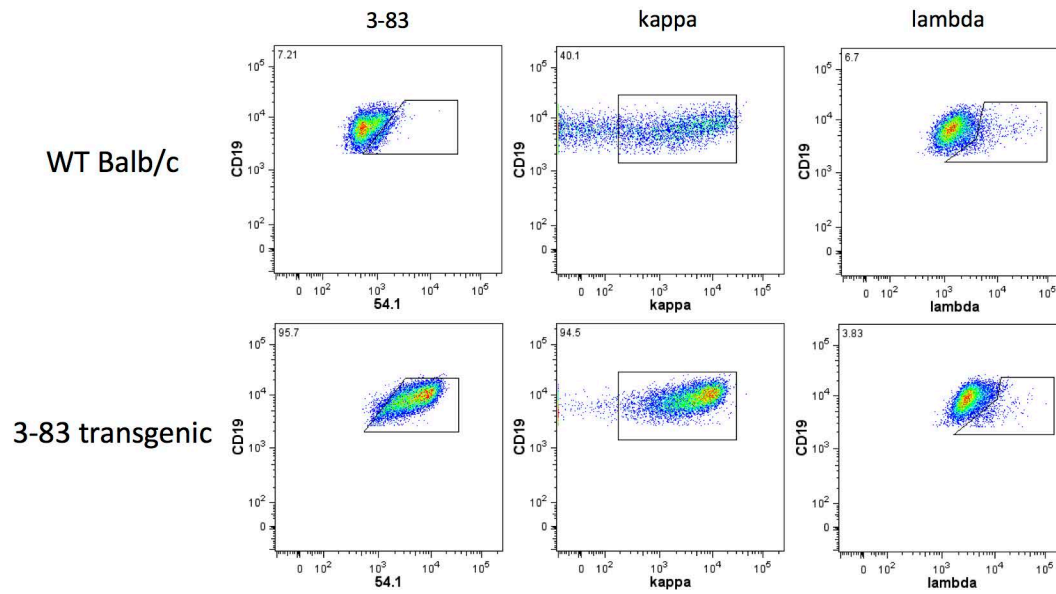

Spleen

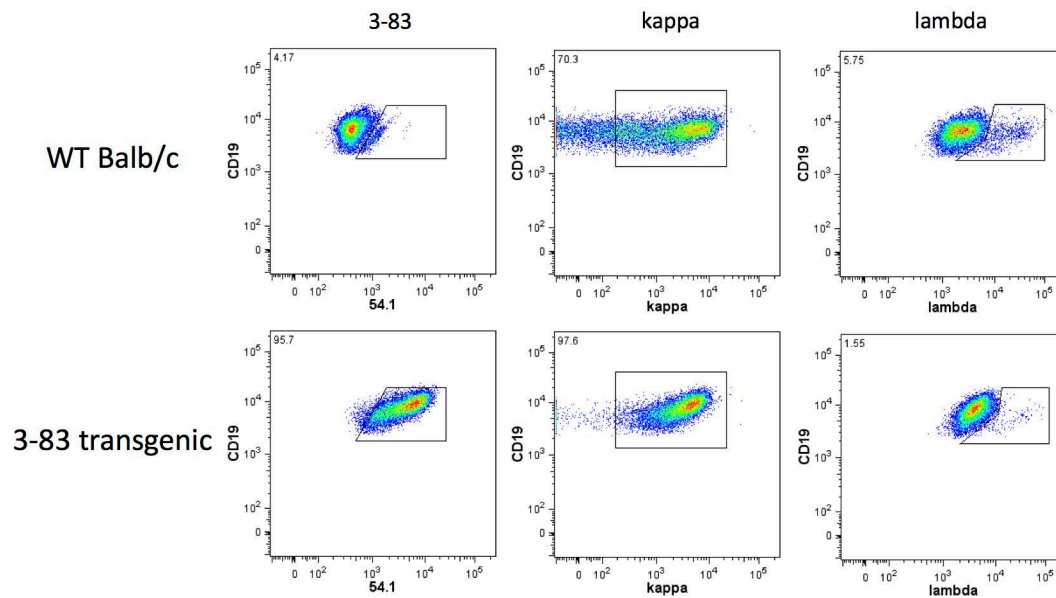

Supplementary Figure 5.

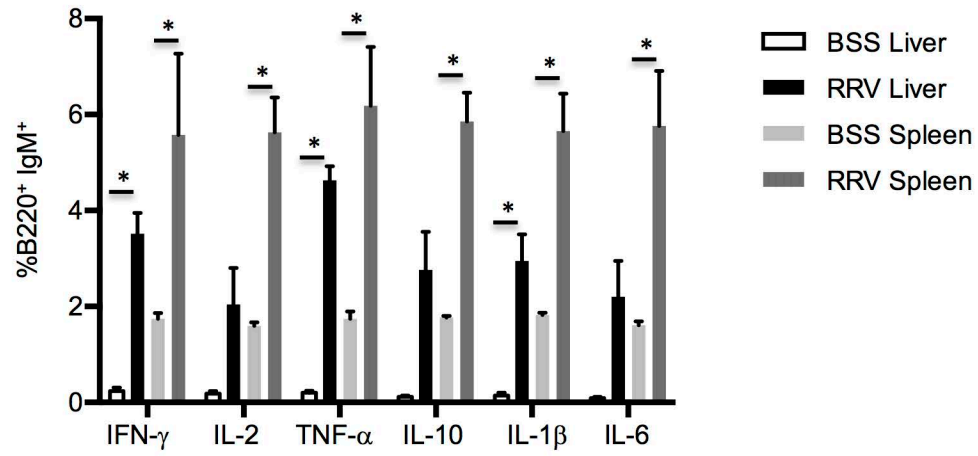

Supplementary Figure 6.

**BSS-control Liver B cells**

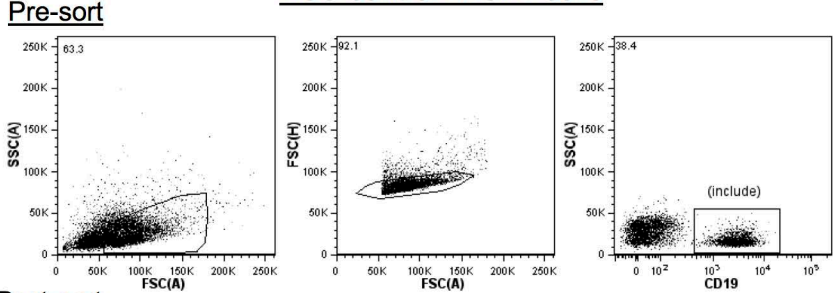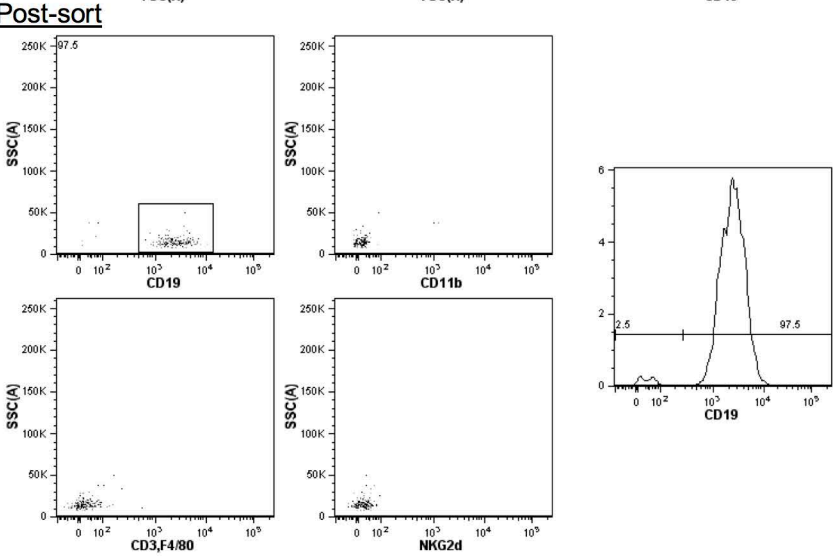

**RRV-BA Liver B cells**

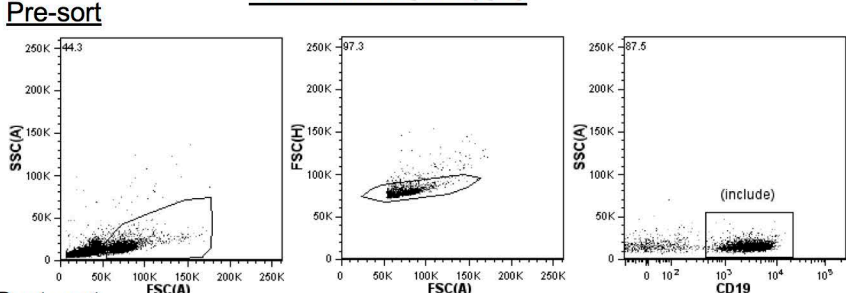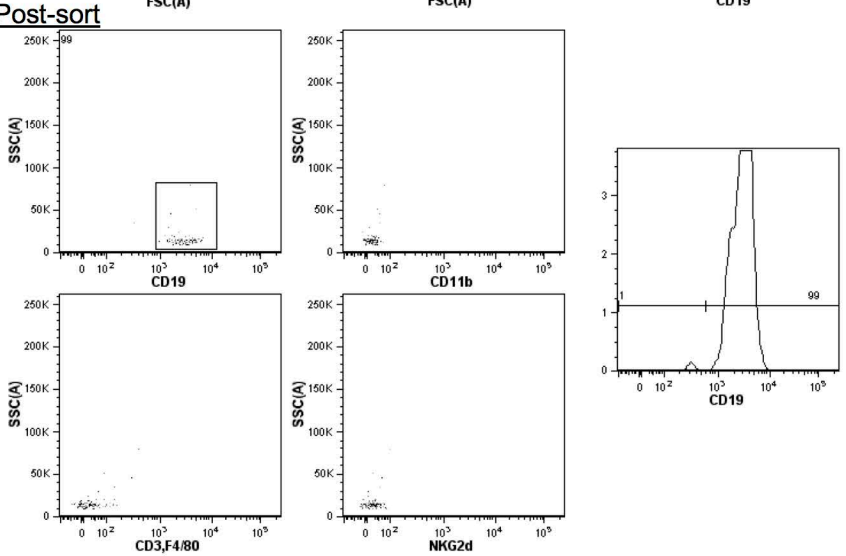



Supplementary Figure 7

|           |                   |          |       |           |                   |           |       |          |                   |               |       |           |                   |           |       |      |                   |  |  |
|-----------|-------------------|----------|-------|-----------|-------------------|-----------|-------|----------|-------------------|---------------|-------|-----------|-------------------|-----------|-------|------|-------------------|--|--|
| Gene      | log2(Fold Change) |          |       | Gene      | log2(Fold Change) |           |       | Gene     | log2(Fold Change) |               |       | Gene      | log2(Fold Change) |           |       | Gene | log2(Fold Change) |  |  |
| Fos       | 4.83              | Trim11   | -1.21 | Nucks1    | -1.56             | Gars      | -1.67 | Nipa2    | -1.8              | Ube2d2a       | -1.94 | Ccnd3     | -2.08             | Fam129b   | -2.29 |      |                   |  |  |
| Ly6a      | 3.9               | Rfc5     | -1.25 | Pkmyt1    | -1.56             | Gnb2      | -1.68 | Tradd    | -1.8              | Pde12         | -1.94 | Tbc1d20   | -2.08             | Inpp1     | -2.3  |      |                   |  |  |
| Ifi44i    | 2.61              | Hells    | -1.28 | Dscc1     | -1.56             | Fnta      | -1.68 | Brd2     | -1.81             | Fbxo30        | -1.94 | Fkbp1a    | -2.08             | Tbcn2     | -2.31 |      |                   |  |  |
| Neat1     | 2.48              | Ppp1r16b | -1.31 | Hist1h1b  | -1.57             | Hiat1     | -1.68 | Dhx33    | -1.81             | Hist1h4d      | -1.95 | Arsb      | -2.08             | Endod1    | -2.31 |      |                   |  |  |
| Map3k8    | 2.48              | H2afy    | -1.32 | Tmem2     | -1.57             | Lrrc8c    | -1.68 | Mapkap1  | -1.81             | Pdcd6ip       | -1.95 | Ddx28     | -2.08             | Kti12     | -2.31 |      |                   |  |  |
| Pdia4     | 2.47              | Ppp1r15b | -1.32 | Csnk1a1   | -1.57             | Xylt2     | -1.68 | Ticrr    | -1.81             | Derf1         | -1.95 | Eri1      | -2.09             | Insig1    | -2.31 |      |                   |  |  |
| Fga       | 2.4               | Cd47     | -1.32 | Zbtb1     | -1.58             | Zfp280b   | -1.69 | Socs4    | -1.81             | Mff           | -1.95 | Idh2      | -2.1              | Cdt1      | -2.33 |      |                   |  |  |
| Serpina3g | 2.33              | Ythdf2   | -1.33 | Ube4b     | -1.58             | Sdf2l1    | -1.69 | Fbxo21   | -1.81             | Paqr4         | -1.95 | Fbxo42    | -2.11             | Cox5a     | -2.34 |      |                   |  |  |
| Plaur     | 2.21              | Pgls     | -1.34 | Ccz1      | -1.58             | Arl8b     | -1.7  | Mlec     | -1.82             | Ppp2r2a       | -1.96 | Map1s     | -2.11             | Kcnn4     | -2.36 |      |                   |  |  |
| Sifn1     | 2.18              | Fam65a   | -1.34 | Trp53i11  | -1.59             | Pafah1b2  | -1.7  | Zfp574   | -1.82             | Timm50        | -1.96 | Ddost     | -2.11             | Msh6      | -2.37 |      |                   |  |  |
| Bhlhe41   | 2.14              | Ptges3   | -1.37 | Uba5      | -1.59             | Spg21     | -1.7  | Rhot1    | -1.82             | Mfsd1         | -1.96 | Ccng2     | -2.12             | Lsm2      | -2.37 |      |                   |  |  |
| Icosl     | 2.12              | Setd8    | -1.38 | Capn7     | -1.59             | Smarcd1   | -1.7  | Creg1    | -1.82             | Gemin5        | -1.97 | Pgam5     | -2.12             | Impdh1    | -2.38 |      |                   |  |  |
| Gimap3    | 2.11              | Sf1      | -1.39 | Trp53inp2 | -1.59             | Rbm38     | -1.7  | Hnrnpul1 | -1.83             | Cand2         | -1.97 | Plaa      | -2.12             | Strap     | -2.38 |      |                   |  |  |
| Ppp1r15a  | 2.09              | Ncoa5    | -1.39 | Sirt7     | -1.59             | Rsnax     | -1.71 | Flywch1  | -1.83             |               |       | Cyc1      | -2.12             | Mob1a     | -2.38 |      |                   |  |  |
| Ly6c2     | 2.02              | Ywhah    | -1.39 | Keap1     | -1.59             | Nubp1     | -1.71 | Cdc16    | -1.83             | Hacd2         | -1.97 | H2afj     | -2.12             | Dr1       | -2.39 |      |                   |  |  |
| Lta       | 1.91              | Polg     | -1.4  | Uggt1     | -1.6              | Ldlrap1   | -1.71 | Mrsps15  | -1.83             | Atpaf1        | -1.97 | Emc6      | -2.13             | Desi1     | -2.41 |      |                   |  |  |
| Gimap7    | 1.9               | Oxct1    | -1.4  | lws1      | -1.6              | Fam73a    | -1.71 | Ankra2   | -1.83             | Smim10l1      | -1.98 | Spl1      | -2.13             | Sdc1      | -2.43 |      |                   |  |  |
| Gdap10    | 1.9               | Wtap     | -1.4  | Arcn1     | -1.6              | Zcrb1     | -1.71 | Gtpbp1   | -1.84             | Impa2         | -1.98 | Mto1      | -2.13             | Zfp358    | -2.43 |      |                   |  |  |
| Lime1     | 1.89              | Dnajc3   | -1.41 | Pdk2      | -1.6              | Ext2      | -1.71 | Ela2     | -1.84             | Fam129c       | -1.99 | Ndnl2     | -2.13             | Atp1b3    | -2.45 |      |                   |  |  |
| Fcer2a    | 1.8               | Casc5    | -1.42 | Dync1li1  | -1.6              | Hist1h1e  | -1.71 | Letm1    | -1.85             | Acss1         | -1.99 | Ube2s     | -2.14             | Haus4     | -2.47 |      |                   |  |  |
| H2-DMb1   | 1.78              | Slc1a5   | -1.42 | Trip13    | -1.61             | Strip1    | -1.72 | Klh12    | -1.85             | Sgol2a        | -1.99 | Dbr1      | -2.15             | Sephs2    | -2.48 |      |                   |  |  |
| Gimap4    | 1.75              | Eif3b    | -1.42 | Ythdf3    | -1.61             | Mrp13     | -1.72 | Cdkn2aip | -1.85             | Map2k3        | -1.99 | Twistnb   | -2.16             | Cpa3      | -2.49 |      |                   |  |  |
| Ms4a4c    | 1.75              | Epha2    | -1.43 | Usp39     | -1.62             | Aspm      | -1.73 | Ctnnb1   | -1.86             | Swsap1        | -1.99 | Nme4      | -2.16             | Mcm6      | -2.51 |      |                   |  |  |
| Cr2       | 1.74              | Ezh2     | -1.44 | Zbtb11    | -1.62             | Uhrf1bpl1 | -1.73 | Cand1    | -1.86             | Nup50         | -2    | Psmd3     | -2.17             | Fam109a   | -2.51 |      |                   |  |  |
| Cdh17     | 1.73              | Slc4a7   | -1.44 | Atp11b    | -1.62             | Arid3a    | -1.74 | Gtf3c4   | -1.87             | Trpc4ap       | -2    | Tmem185b  | -2.17             | Xbp1      | -2.52 |      |                   |  |  |
| Nek8      | 1.68              | Ranbp1   | -1.45 | Mta2      | -1.62             | Efr3a     | -1.74 | Parg     | -1.87             | Tcerg1        | -2    | Srsf6     | -2.18             | Slc16a1   | -2.53 |      |                   |  |  |
| Macf1     | 1.66              | Eef2k    | -1.46 | Rheb      | -1.62             | Ankrd10   | -1.75 | Snip1    | -1.87             | Jakmip1       | -2    | Mtmr14    | -2.18             | Rnf26     | -2.54 |      |                   |  |  |
| Sf1       | 1.65              | Map3k4   | -1.46 | Pdia3     | -1.62             | Rn45s     | -1.75 | Serp1    | -1.87             | Ash2l         | -2    | Ctla      | -2.18             | Mybl2     | -2.56 |      |                   |  |  |
| Irf7      | 1.61              | Rae1     | -1.46 | Otub2     | -1.63             | Dhx32     | -1.75 | Fbxw11   | -1.88             | Itfg1         | -2    | Acs3      | -2.18             | Mrfap1    | -2.6  |      |                   |  |  |
| Fgd2      | 1.56              | Ints8    | -1.47 | Rps6ka5   | -1.63             | Acadl     | -1.75 | Nop9     | -1.88             | Slc25a1       | -2    | Hist1h2ab | -2.19             | Tm9sf2    | -2.61 |      |                   |  |  |
| Eif4a2    | 1.56              | Caprin1  | -1.47 | Esyt1     | -1.63             | Raf1      | -1.76 | Csrnp2   | -1.88             | Topors        | -2.01 | Rnf168    | -2.2              | Sapcd2    | -2.61 |      |                   |  |  |
| Ccr6      | 1.56              | Mlf2     | -1.47 | Jup       | -1.63             | Klcl1     | -1.76 | Cactin   | -1.88             | Pspc1         | -2.01 | Unc119b   | -2.21             | Uqcrf51   | -2.65 |      |                   |  |  |
| Gimap6    | 1.54              | Trim37   | -1.48 | Atxn7l3b  | -1.63             | Exosc3    | -1.76 | Pdk3     | -1.89             | Ndfip1        | -2.01 | Sart3     | -2.22             | Tjp3      | -2.69 |      |                   |  |  |
| Gadd45g   | 1.53              | Rnf115   | -1.48 | Pcbp3     | -1.63             | Arf5      | -1.76 | Mylip    | -1.9              | Srsf1         | -2.02 | Tgfb1     | -2.22             | Tsen34    | -2.71 |      |                   |  |  |
| Fyco1     | 1.53              | Cyth3    | -1.49 | Racgap1   | -1.65             | Ndufab1   | -1.76 | Utp18    | -1.9              | Med16         | -2.02 | Mcpt4     | -2.22             | Chchd10   | -2.74 |      |                   |  |  |
| Lax1      | 1.48              | Ccnl2    | -1.5  | Natd1     | -1.65             | Dyrk1b    | -1.76 | Dbf4     | -1.91             | Cmtm7         | -2.03 | Gsg2      | -2.23             | Dut       | -2.76 |      |                   |  |  |
| Cyp4f18   | 1.48              | Kif5b    | -1.5  | Mplkip    | -1.65             | Ankle1    | -1.77 | Plk4     | -1.91             | Fam43a        | -2.03 | Clic4     | -2.23             | Hmga2-ps1 | -2.81 |      |                   |  |  |
| Cd83      | 1.44              | Rab14    | -1.5  | Plagl2    | -1.65             | Gde1      | -1.77 | Tdp2     | -1.91             | Cdc42ep3      | -2.03 | Ddx20     | -2.23             | H1f0      | -2.93 |      |                   |  |  |
| Dennd2d   | 1.44              | Mpnd     | -1.51 | Psme3     | -1.65             | Fzr1      | -1.78 | Simc1    | -1.91             | Adssl1        | -2.03 | Hes6      | -2.24             | Tpsb2     | -3.14 |      |                   |  |  |
| Lat2      | 1.44              | Arih2    | -1.52 | Atp6v0a2  | -1.66             | Dnlz      | -1.78 | Cry2     | -1.91             | 2810403A07Rik | -2.04 | Ets2      | -2.25             | Cma1      | -3.35 |      |                   |  |  |
| Haao      | 1.42              | Myb      | -1.53 | Armc5     | -1.66             | Trnau1ap  | -1.78 | Paox     | -1.91             | Mms22l        | -2.05 | Usp38     | -2.26             | Nek2      | -3.36 |      |                   |  |  |
| Anks3     | 1.41              | H2afv    | -1.53 | Rfk       | -1.66             | Homez     | -1.78 | Cox18    | -1.91             | Tmem9b        | -2.05 | Slc2a8    | -2.26             | Kbtbd6    | -3.43 |      |                   |  |  |
| Rappgef4  | 1.38              | Pip5k1c  | -1.53 | Tmem30a   | -1.66             | Lmb2      | -1.79 | Cdc20    | -1.92             | Hif1a         | -2.06 | Tbc1d10a  | -2.26             | H2afx     | -3.45 |      |                   |  |  |
| H2-DMb2   | 1.36              | Fbxw2    | -1.53 | Fgf13     | -1.66             | Naa15     | -1.79 | Naa50    | -1.92             | Marcks1       | -2.06 | Tomm20    | -2.28             | Alas2     | -4.43 |      |                   |  |  |
| Ciita     | 1.33              | Tmem135  | -1.53 | Ptdss2    | -1.66             | H13       | -1.79 | Gnai2    | -1.92             | Lrrc59        | -2.07 | Cog8      | -2.28             | Tpsab1    | -4.87 |      |                   |  |  |
| Cd55      | 1.31              | Apaf1    | -1.54 | Ypel3     | -1.66             | Abhd17a   | -1.79 | Maf1     | -1.92             | Slc25a46      | -2.07 | Emc8      | -2.29             |           |       |      |                   |  |  |
| Uba7      | 1.21              | Gltp     | -1.54 | Ifnar2    | -1.66             | Ostf1     | -1.79 | Usp22    | -1.93             | Hmgn1         | -2.07 | Tmem70    | -2.29             |           |       |      |                   |  |  |
| Cd22      | 1.19              | Thoc3    | -1.54 | Ak3       | -1.67             | Vps37a    | -1.79 | Ostm1    | -1.93             | Trim35        | -2.07 | Fam83d    | -2.29             |           |       |      |                   |  |  |
| Tsc22d3   | 1.16              | Rbl1     | -1.55 | Ppm1g     | -1.67             | Smarcc1   | -1.8  | Cbx2     | -1.94             | Abhd8         | -2.07 | Prkch     | -2.29             |           |       |      |                   |  |  |
